# Supplementary material
Source: PubMed Central journal article supplement (PMC6311497)
Supplement: supp_RA118.005672_140535_1_supp_219506_pgp2jp.pdf [file supp_RA118.005672_140535_1_supp_219506_pgp2jp.pdf]

## Supporting Information

The cyclic nucleotide-binding homology domain of CNNM mediates dimerization and is required for Mg<sup>2+</sup> efflux activity

**Yu Seby Chen<sup>1</sup>, Guennadi Kozlov<sup>1</sup>, Rayan Fakih<sup>1</sup>, Yosuke Funato<sup>2</sup>, Hiroaki Miki<sup>2</sup>, Kalle Gehring<sup>1\*</sup>**

From the <sup>1</sup>Department of Biochemistry & Centre for Structural Biology, McGill University, Montreal, QC H3G 0B1, Canada; <sup>2</sup>Department of Cellular Regulation, Research Institute for Microbial Diseases, Osaka University, Suita, Osaka, Japan.

### Supplemental Figures

```
SEDYRDTVVKRKPASLMAPLKRKEEFSLFKVSDDEYKVTISPQLLLATQRF
                1                2
LSREVDVFSPLRISEKVLLHLLKHPSVNQEVRFDESNRLATHHYLYQRSQP
                3
VDYFILILQGRVEVEIGKEGLKFENGAFTYYGVSALTVPSSVHQSPVSSLQ
                4                5
PIRHDLQPDPGDGTHSSAYCPDYTVRALS DLQLIKVTRLQYLNALLATRAQ
                6 7
NLPQSPENTDLQVIPGSQTRLLGEKTTTAAGSSHSRPGVPVEGSPGRNPGV
```

**Figure S1.** Methionine substitutions tested for phasing of the CNNM3 CNBH domain. The amino acid sequence of human CNNM3 is shown for residues 453 to 707. The naturally occurring methionine is shown in red. Sites of methionine substitutions are shown in blue and numbered 1 to 7. The best diffracting crystals were obtained with methionines at sites 1, 3, 4, 5, 6, and 7.

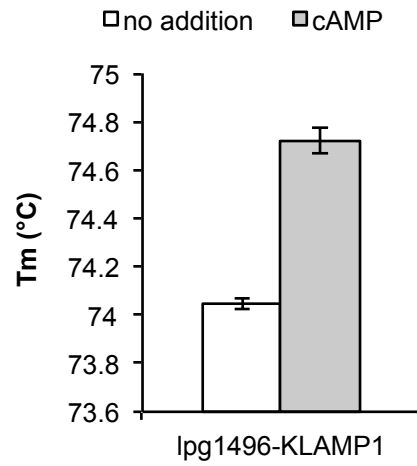

**Figure S2.** Thermal shift assays of positive control protein lpg1496-KLAMP1 in presence and absence of 1 mM cAMP. The melting temperature is increased by 0.7°C with addition of 1 mM cAMP. Each experiment was performed in triplicates. The error bars represent standard error.

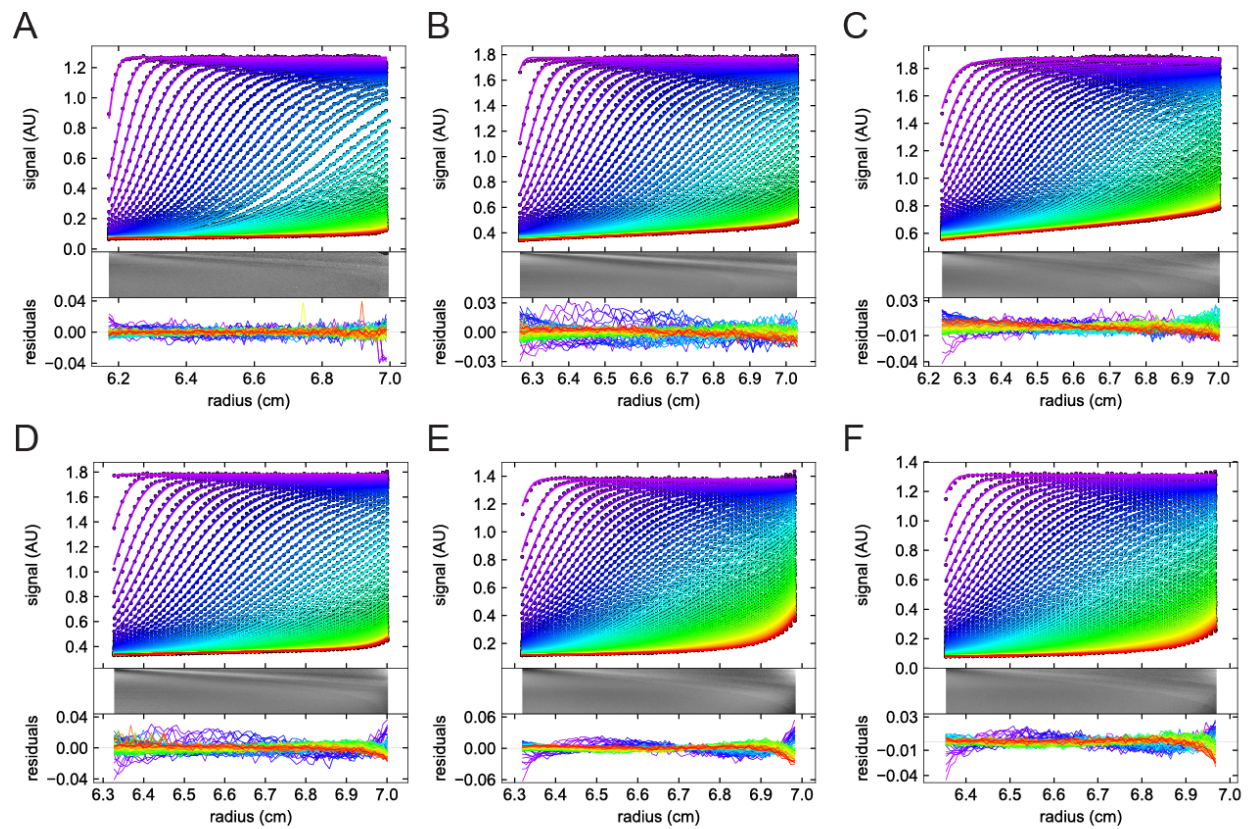

**Figure S3.** Representative sedimentation velocity AUC profile of 60  $\mu\text{M}$  purified CNBH domains. (A) CNNM1 (B) CNNM2 (C) CNNM3 (D) CNNM4 (E) CNNM3 L575K (F) CNNM3 F577K

The absorbance of the sample at 280 nm and residuals are plotted against the radial position in the cell.

One in every 15 scans is plotted.

**Table S1.** Thermal shift assay raw data

| Protein        | Condition                | T <sub>m</sub> (°C) |             |             |       |                |
|----------------|--------------------------|---------------------|-------------|-------------|-------|----------------|
|                |                          | Replicate 1         | Replicate 2 | Replicate 3 | Mean  | Standard Error |
| CNNM1_CNBHD    | no addition              | 48.20               | 48.02       | 48.11       | 48.11 | 0.05           |
| CNNM1_CNBHD    | cAMP                     | 48.15               | 48.01       | 48.13       | 48.10 | 0.05           |
| CNNM1_CNBHD    | cAMP + MgCl <sub>2</sub> | 48.16               | 48.15       | 48.10       | 48.14 | 0.02           |
| CNNM1_CNBHD    | cGMP                     | 48.17               | 48.04       | 48.01       | 48.08 | 0.05           |
| CNNM1_CNBHD    | cGMP + MgCl <sub>2</sub> | 48.16               | 48.18       | 48.29       | 48.21 | 0.04           |
| CNNM2_CNBHD    | no addition              | 50.23               | 49.94       | 50.10       | 50.09 | 0.09           |
| CNNM2_CNBHD    | cAMP                     | 50.12               | 50.14       | 50.19       | 50.15 | 0.02           |
| CNNM2_CNBHD    | cAMP + MgCl <sub>2</sub> | 50.32               | 50.18       | 50.07       | 50.19 | 0.07           |
| CNNM2_CNBHD    | cGMP                     | 50.34               | 50.21       | 50.13       | 50.23 | 0.06           |
| CNNM2_CNBHD    | cGMP + MgCl <sub>2</sub> | 50.39               | 50.30       | 50.32       | 50.34 | 0.03           |
| CNNM3_CNBHD    | no addition              | 49.49               | 49.48       | 49.43       | 49.47 | 0.02           |
| CNNM3_CNBHD    | cAMP                     | 49.43               | 49.38       | 49.43       | 49.41 | 0.02           |
| CNNM3_CNBHD    | cAMP + MgCl <sub>2</sub> | 49.35               | 49.69       | 49.32       | 49.46 | 0.12           |
| CNNM3_CNBHD    | cGMP                     | 49.54               | 49.32       | 49.43       | 49.43 | 0.07           |
| CNNM3_CNBHD    | cGMP + MgCl <sub>2</sub> | 49.38               | 49.35       | 49.67       | 49.47 | 0.10           |
| CNNM4_CNBHD    | no addition              | 52.46               | 52.53       | 52.36       | 52.45 | 0.05           |
| CNNM4_CNBHD    | cAMP                     | 52.56               | 52.50       | 52.56       | 52.54 | 0.02           |
| CNNM4_CNBHD    | cAMP + MgCl <sub>2</sub> | 52.50               | 52.39       | 52.40       | 52.43 | 0.03           |
| CNNM4_CNBHD    | cGMP                     | 52.65               | 52.64       | 52.53       | 52.61 | 0.04           |
| CNNM4_CNBHD    | cGMP + MgCl <sub>2</sub> | 52.58               | 52.64       | 52.63       | 52.62 | 0.02           |
| lpg1496_KLAMP1 | no addition              | 74.08               | 74.01       | 74.05       | 74.05 | 0.02           |
| lpg1496_KLAMP1 | cAMP                     | 74.67               | 74.67       | 74.82       | 74.72 | 0.05           |

**Table S2.** SV-AUC sedimentation coefficients and estimated molecular weights

| CNBH domain    | [Protein]<br>( $\mu$ M) | Sedimentation coefficient (S) |        | Estimated MW (kDa) |        | RMSD   | Theoretical MW (kDa) |       |
|----------------|-------------------------|-------------------------------|--------|--------------------|--------|--------|----------------------|-------|
|                |                         | Peak 1                        | Peak 2 | Peak 1             | Peak 2 |        | Monomer              | Dimer |
| CNNM1          | 60                      | 2.52                          | 3.68   | 28.1               | 52.9   | 0.0051 |                      |       |
|                | 30                      | 2.62                          | 3.68   | 30.2               | 46.7   | 0.0049 | 27.0                 | 54.0  |
|                | 15                      | 2.75                          | 3.70   | 33.3               | 43.1   | 0.0043 |                      |       |
| CNNM2          | 60                      | 2.65                          | 3.10   | 22.3               | 40.7   | 0.0053 |                      |       |
|                | 30                      | 2.19                          | 3.11   | 24.4               | 40.9   | 0.0047 | 22.7                 | 45.4  |
|                | 15                      | 2.11                          | 3.04   | 25.8               | 41.1   | 0.0028 |                      |       |
| CNNM3          | 60                      | 2.76                          | -      | 44.2               | -      | 0.0050 |                      |       |
|                | 30                      | 2.70                          | -      | 37.1               | -      | 0.0031 | 23.9                 | 47.8  |
|                | 15                      | 2.67                          | -      | 35.8               | -      | 0.0025 |                      |       |
| CNNM4          | 60                      | 2.38                          | 3.15   | 25.5               | 37.3   | 0.0053 |                      |       |
|                | 30                      | 2.25                          | 3.11   | 25.5               | 40.2   | 0.0043 | 25.0                 | 50.0  |
|                | 15                      | 2.24                          | 3.06   | 25.3               | 35.6   | 0.0031 |                      |       |
| CNNM3<br>L575K | 60                      | 2.08                          | -      | 20.7               | -      | 0.0054 |                      |       |
|                | 30                      | 2.04                          | -      | 21.5               | -      | 0.0045 | 23.9                 | 47.8  |
|                | 15                      | 1.99                          | -      | 20.5               | -      | 0.0031 |                      |       |
| CNNM3<br>F577K | 60                      | 1.95                          | -      | 21.3               | -      | 0.0053 |                      |       |
|                | 30                      | 1.91                          | -      | 21.1               | -      | 0.0035 | 23.9                 | 47.8  |
|                | 15                      | 1.90                          | -      | 20.7               | -      | 0.0025 |                      |       |
